# Supplementary material for: The burden of SARS-CoV-2 Infection and Severe Illness in South Africa March 2020-August 2022: A synthesis of epidemiological data
Source: bioRxiv or medRxiv preprint supplement (doi:10.1101/2024.10.30.24316404), 2024-11-04
Supplement: Supplementary file [file media-1.pdf]

## Supplement

Supplementary table 1: Wave timing definitions for the first five SARS-CoV-2 waves in South Africa

| Wave number | Cases           |                                 |                 | Hospitalisations |                              |                 | Deaths          |                                  |                 |
|-------------|-----------------|---------------------------------|-----------------|------------------|------------------------------|-----------------|-----------------|----------------------------------|-----------------|
|             | Range           |                                 | Peak            | Range            |                              | Peak            | Range           |                                  | Peak            |
|             | Epiyear/epiweek | Date                            | Epiyear/epiweek | Epiyear/epiweek  | Date                         | Epiyear/epiweek | Epiyear/epiweek | Date                             | Epiyear/epiweek |
| <b>1</b>    | 2020/10–2020/39 | 1 March 2020–6 September 2020   | 2020/28         | 2020/10–2020/40  | 1 March 2020–3 October 2020  | 2020/29         | 2020/10–2020/42 | 01 March 2020 – 17 October 2020  | 2020/29         |
| <b>2</b>    | 2020/40–2021/13 | 27 September 2020–03 April 2021 | 2021/01         | 2020/41–2021/13  | 4 October 2020–3 April 2021  | 2021/01         | 2020/43–2021/13 | 18 October 2020 – 03 April 2021  | 2021/01         |
| <b>3</b>    | 2021/14–2021/44 | 4 April 2021–06 November 2021   | 2021/26         | 2021/14–2021/44  | 4 April 2021–6 November 2021 | 2021/27         | 2021/14–2021/46 | 04 April 2021 – 20 November 2021 | 2021/27         |
| <b>4</b>    | 2021/45–2022/12 | 7 November 2021–26 March 2022   | 2021/49         | 2021/45–2022/13  | 7 November 2021–2 April 2022 | 2021/50         | 2021/47–2022/14 | 21 November 2021 – 09 April 2022 | 2021/52         |
| <b>5</b>    | 2022/13–2022/32 | 27 March 2022–13 August 2022    | 2022/19         | 2022/14–2022/32  | 3 April 2022–13 August 2022  | 2022/19         | 2022/15–2022/32 | 10 April 2022 – 13 August 2022   | 2022/19         |
